# Supplementary material
Source: publisher site journal article supplement (https://www.spandidos-publications.com/3875/downloadSupplementary)
Supplement: Supplementary file 1 [file downloadSupplementary]

## Sheet: Dataset of 1 microarray norm
Table SI. The 132 detected miRNAs list using microarray analysis with the annotation of human miRbase.
		Fluorescent signal (Log)																Fluorescent signal (Absolute value)																Average of fluorescent signal				Fold change (Average)
systematic_name	miRBase accession No.	0 Gy-#1 Log	0 Gy-#2 Log	0 Gy-#3 Log	0 Gy-#4 Log	2 Gy-#1 Log	2 Gy-#2 Log	2 Gy-#3 Log	2 Gy-#4 Log	6 Gy-#1 Log	6 Gy-#2 Log	6 Gy-#3 Log	6 Gy-#4 Log	10 Gy-#1 Log	10 Gy-#2 Log	10 Gy-#3 Log	10 Gy-#4 Log	0 Gy-#1 Av	0 Gy-#2 Av	0 Gy-#3 Av	0 Gy-#4 Av	2 Gy-#1 Av	2 Gy-#2 Av	2 Gy-#3 Av	2 Gy-#4 Av	6 Gy-#1 Av	6 Gy-#2 Av	6 Gy-#3 Av	6 Gy-#4 Av	10 Gy-#1 Av	10 Gy-#2 Av	10 Gy-#3 Av	10 Gy-#4 Av	Ave. 0Gy	Ave. 2Gy	Ave. 6Gy	Ave. 10Gy	2Gy/0Gy	6Gy/0Gy	10Gy/0Gy
hsa-let-7b	MIMAT0000063	2.24653	3.20338	0.837564	2.82725	1.01401	2.558	0.857961	1.03868	-0.00367212	1.96708	0.729777	-0.637119	1.62455	2.14302	1.72751	1.3198	4.74542	9.21115	1.78703	7.0972	2.01952	5.88889	1.81247	2.05434	0.997458	3.90975	1.65838	0.642996	3.08346	4.41686	3.31157	2.49632	5.7102	2.94381	1.80215	3.32705	0.515535	0.315601	0.582651
hsa-miR-1181	MIMAT0005826	2.90326	2.39567	3.35744	2.60874	3.17823	3.05087	2.95277	3.02824	3.54906	3.29824	3.26613	2.80449	3.23771	2.95789	2.91625	3.21923	7.48114	5.26222	10.2492	6.09971	9.05195	8.2871	7.74237	8.15816	11.7051	9.83712	9.62059	6.98612	9.43297	7.76989	7.54884	9.3129	7.27308	8.30989	9.53722	8.51615	1.14256	1.3113	1.17091
hsa-miR-1183	MIMAT0005828	-1.01182	-0.396058	-0.425852	-0.348193	0.168256	-0.137117	0.263441	0.159072	-0.0566201	0.135255	0.162988	-0.00410175	0.199668	-0.259556	0.107359	0.263378	0.495921	0.759932	0.744399	0.785568	1.1237	0.909335	1.20034	1.11657	0.961514	1.09829	1.1196	0.997161	1.14843	0.835345	1.07725	1.20029	0.696455	1.08749	1.04414	1.06533	1.56146	1.49922	1.52965
hsa-miR-1202	MIMAT0005865	5.52707	5.68534	6.97779	5.71637	6.8128	6.42744	6.64556	6.76313	6.6928	6.64672	6.67477	7.08404	6.48653	6.00325	6.28372	6.70927	46.1119	51.4585	126.045	52.5774	112.424	86.0704	100.118	108.619	103.451	100.199	102.166	135.678	89.6685	64.1445	77.909	104.638	69.0482	101.808	110.373	84.0901	1.47444	1.5985	1.21785
hsa-miR-1207-5p	MIMAT0005871	5.79505	6.19539	7.03668	6.22778	7.28835	6.87558	7.07967	7.19562	7.05295	7.16695	7.2147	7.56994	7.06077	6.65589	6.81119	7.27884	55.5244	73.2822	131.296	74.9461	156.319	117.424	135.268	146.588	132.785	143.703	148.539	190.011	133.507	100.838	112.298	155.292	83.7623	138.9	153.76	125.484	1.65826	1.83567	1.49809
hsa-miR-1224-5p	MIMAT0005458	1.02598	0.999052	1.89899	1.16306	2.1513	1.78331	2.08912	2.14559	1.90484	1.94455	1.99201	2.29373	1.84238	1.41769	1.59734	2.02149	2.03634	1.99869	3.72953	2.23932	4.44229	3.44214	4.2549	4.42473	3.74468	3.84918	3.9779	4.90324	3.586	2.67158	3.02585	4.06004	2.50097	4.14102	4.11875	3.33587	1.65577	1.64686	1.33383
hsa-miR-1225-3p	MIMAT0005573	-0.823371	-1.16569	-0.195499	-0.751741	-0.169455	-0.50962	-0.00236464	0.0384893	-0.0283847	-0.177727	-0.16738	0.136762	-0.379756	-0.75777	-0.657493	-0.00719118	0.56512	0.445751	0.873271	0.593886	0.889178	0.702407	0.998362	1.02704	0.980518	0.884095	0.890458	1.09943	0.768567	0.59141	0.633979	0.995028	0.619507	0.904246	0.963626	0.747246	1.45962	1.55547	1.20619
hsa-miR-1225-5p	MIMAT0005572	6.2664	6.23156	7.27919	6.44071	7.30505	6.83114	7.28973	7.30898	7.26853	7.12444	7.27546	7.50913	6.97675	6.51129	6.75868	7.27155	76.9795	75.1424	155.33	86.8652	158.139	113.862	156.469	158.57	154.186	139.53	154.929	182.169	125.954	91.2204	108.284	154.509	98.5793	146.76	157.704	119.992	1.48875	1.59976	1.21721
hsa-miR-1226*	MIMAT0005576	0.513162	0.71558	1.22418	0.958836	1.87264	1.58023	1.69611	1.83178	1.47331	1.7515	1.76197	1.98262	1.66249	1.32301	1.42989	1.8901	1.42717	1.64214	2.33623	1.94374	3.66203	2.99017	3.24026	3.55977	2.77659	3.36708	3.3916	3.95211	3.16562	2.50187	2.69426	3.70662	1.83732	3.36306	3.37184	3.01709	1.83041	1.8352	1.64212
hsa-miR-1228	MIMAT0005583	0.959037	0.678407	1.86486	1.11363	1.7827	1.3352	2.00713	2.02227	1.98097	1.70203	1.76364	1.95617	1.45821	1.05536	1.10777	1.75754	1.94401	1.60037	3.64232	2.1639	3.4407	2.5231	4.01982	4.06221	3.94758	3.25358	3.39553	3.88031	2.74767	2.07823	2.15512	3.38121	2.33765	3.51146	3.61925	2.59056	1.50213	1.54824	1.10819
hsa-miR-1229	MIMAT0005584	0.47585	0.609366	0.826105	0.171716	0.728776	0.979794	0.352924	0.645076	1.58286	1.35043	1.02773	0.749069	1.16726	0.840189	1.00127	0.992459	1.39074	1.52559	1.77289	1.1264	1.65723	1.97218	1.27715	1.56382	2.99563	2.54987	2.03881	1.68071	2.24585	1.79028	2.00176	1.98957	1.4539	1.6176	2.31625	2.00687	1.11259	1.59313	1.38033
hsa-miR-1234	MIMAT0005589	-0.634117	-1.23868	0.147761	-1.04095	-0.47939	-1.01825	-0.257	-0.346121	0.189192	-0.528205	-0.318038	-0.242637	-0.735831	-1.18529	-1.10528	-0.506036	0.644335	0.423761	1.10785	0.486009	0.717281	0.493715	0.836826	0.786697	1.14012	0.693417	0.80216	0.845199	0.600472	0.439736	0.464811	0.704155	0.665489	0.70863	0.870225	0.552293	1.06483	1.30765	0.829907
hsa-miR-1237	MIMAT0005592	-1.11089	-1.32489	-0.275138	-0.956878	-0.246883	-0.667567	-0.0610127	-0.000520706	-0.042541	-0.206999	-0.387259	0.0454135	-0.516588	-0.977222	-0.995104	-0.246539	0.46301	0.39918	0.826371	0.515171	0.842715	0.629567	0.958591	0.999639	0.970943	0.866338	0.764581	1.03198	0.699023	0.507957	0.5017	0.842916	0.550933	0.857628	0.90846	0.637899	1.55668	1.64895	1.15785
hsa-miR-1238	MIMAT0005593	-0.639071	-0.843273	0.103617	-0.453496	0.294386	-0.154955	0.481175	0.515239	0.334861	0.241581	0.136554	0.515007	-0.00763845	-0.384496	-0.380836	0.35213	0.642126	0.557378	1.07446	0.730271	1.22636	0.89816	1.39588	1.42923	1.26126	1.18229	1.09928	1.429	0.994719	0.766046	0.767992	1.27644	0.75106	1.23741	1.24296	0.951301	1.64755	1.65494	1.26661
hsa-miR-1246	MIMAT0005898	4.50109	4.53262	3.02668	4.89913	1.57634	3.18352	1.8239	1.34919	1.73483	2.79823	3.92956	0.34052	3.88141	4.26832	3.41398	2.8697	22.6445	23.1448	8.1493	29.839	2.98212	9.0852	3.54038	2.5477	3.32841	6.95588	15.2375	1.26621	14.7374	19.2704	10.6589	7.30912	20.9444	4.53885	6.697	12.994	0.216709	0.319751	0.620402
hsa-miR-1249	MIMAT0005901	1.59582	1.1802	2.55871	1.58262	2.25909	1.75252	2.52365	2.51475	2.57757	2.19811	2.28019	2.48178	1.9212	1.47351	1.50516	2.25033	3.02266	2.26608	5.89179	2.99514	4.7869	3.36947	5.75036	5.715	5.96935	4.58876	4.85743	5.58586	3.78738	2.77698	2.83855	4.75791	3.54392	4.90543	5.25035	3.54021	1.38418	1.48151	0.998952
hsa-miR-125a-3p	MIMAT0004602	1.94043	1.96834	2.81471	1.96402	2.81288	2.30641	2.81297	2.74108	3.01075	2.81455	2.97019	3.11613	2.79992	2.32523	2.5787	3.00059	3.83819	3.91318	7.03579	3.90148	7.02684	4.9465	7.0273	6.6857	8.05983	7.03502	7.83638	8.6706	6.964	5.01146	5.97401	8.00329	4.67216	6.42158	7.90046	6.48819	1.37444	1.69096	1.38869
hsa-miR-1268	MIMAT0005922	3.99518	4.15611	4.81466	4.15723	4.59011	4.38583	4.41481	4.55601	4.47229	4.46422	4.55073	4.73382	4.32606	4.16794	4.25647	4.61839	15.9466	17.8285	28.142	17.8423	24.0858	20.9058	21.3299	23.5232	22.1969	22.0731	23.4373	26.6086	20.0574	17.9752	19.1128	24.5626	19.9399	22.4612	23.579	20.427	1.12645	1.1825	1.02443
hsa-miR-1274b_v16.0	MIMAT0005938	0.859832	-0.0991921	-0.115944	0.56136	-0.00195742	-0.0511942	-0.0407968	-0.0236793	0.131926	0.100376	0.298306	-0.307886	0.0843463	-0.105554	0.0858007	-0.0619836	1.81483	0.933556	0.922778	1.47566	0.998644	0.965137	0.972118	0.983721	1.09576	1.07205	1.2297	0.807825	1.06021	0.929448	1.06128	0.957946	1.28671	0.979905	1.05133	1.00222	0.761561	0.817074	0.778904
hsa-miR-1275	MIMAT0005929	4.86596	4.93769	6.19836	5.10318	6.37001	5.83274	6.30797	6.31031	5.95699	5.98147	6.08476	6.62264	5.94595	5.37371	5.53413	6.21259	29.1609	30.6473	73.4334	34.3725	82.711	56.9941	79.2295	79.3583	62.1202	63.1834	67.8729	98.5399	61.6464	41.4617	46.3383	74.1609	41.9035	74.5732	72.9291	55.9018	1.77964	1.7404	1.33406
hsa-miR-1288	MIMAT0005942	-0.983323	-0.339098	-0.196592	-0.485462	0.175193	-0.109962	0.191459	0.366561	0.0344744	0.509829	0.346717	-0.0089798	0.203369	0.0642881	0.184046	0.45661	0.505813	0.790535	0.87261	0.714268	1.12912	0.926612	1.14192	1.28928	1.02418	1.42388	1.27166	0.993795	1.15138	1.04557	1.13607	1.37231	0.720807	1.12173	1.17838	1.17633	1.55622	1.63481	1.63197
hsa-miR-1290	MIMAT0005880	1.14579	0.526875	-0.136675	1.03274	-1.60425	-0.839787	-1.44506	-1.66024	-0.832802	-0.678442	0.373545	-1.96657	0.156505	0.391716	-0.0831947	-0.607565	2.21267	1.4408	0.909613	2.04591	0.328906	0.558726	0.367278	0.316387	0.561438	0.62484	1.29553	0.255861	1.11458	1.31195	0.943965	0.656304	1.65225	0.392824	0.684418	1.0067	0.237751	0.414234	0.609292
hsa-miR-1305	MIMAT0005893	-0.158495	0.246449	0.794705	0.0919437	0.858125	0.559606	0.820644	0.957481	0.803812	1.08585	0.941319	0.791742	0.750775	0.656127	0.74923	1.01184	0.895959	1.18628	1.73472	1.06581	1.81268	1.47387	1.76619	1.94192	1.74571	2.12263	1.92028	1.73116	1.6827	1.57585	1.6809	2.01649	1.22069	1.74866	1.87995	1.73898	1.43252	1.54006	1.42459
hsa-miR-134	MIMAT0000447	3.27368	3.74067	4.33723	3.85177	4.82806	4.46579	4.71337	4.82713	4.60882	4.81332	4.80429	5.15521	4.69275	4.24882	4.48292	4.94736	9.6711	13.3677	20.2132	14.4377	28.4047	22.0972	26.2341	28.3865	24.4002	28.1161	27.9405	35.6347	25.8618	19.0118	22.3612	30.8534	14.4224	26.2806	29.0229	24.522	1.82221	2.01234	1.70027
hsa-miR-135a*	MIMAT0004595	2.51401	2.41493	3.36415	2.41989	3.25545	2.84332	3.13545	3.13303	3.38662	3.21854	3.26959	3.19868	3.07625	2.59335	2.78778	3.12107	5.71204	5.33293	10.297	5.35131	9.54964	7.17671	8.78748	8.77275	10.4586	9.30841	9.64374	9.18119	8.43418	6.035	6.90566	8.70035	6.67332	8.57165	9.64798	7.5188	1.28447	1.44575	1.1267
hsa-miR-141	MIMAT0000432	2.26419	1.72032	0.129077	2.33502	1.29498	2.69057	0.353424	0.502511	0.372742	1.29083	0.382307	-4.14906	1.72409	1.40116	1.39509	0.856775	4.80385	3.29511	1.09359	5.04559	2.45374	6.45569	1.27759	1.41668	1.29481	2.44668	1.30342	0.056365	3.30372	2.64113	2.63006	1.81099	3.55953	2.90093	1.27532	2.59647	0.814974	0.358283	0.729442
hsa-miR-1471	MIMAT0007349	0.484856	0.558825	2.08081	0.287669	1.40124	0.911699	1.05809	1.273	1.33416	1.29329	1.19758	1.27	0.933819	0.409935	0.69284	0.986015	1.39945	1.47307	4.23043	1.22067	2.64128	1.88126	2.08217	2.41664	2.52129	2.45086	2.29355	2.41161	1.91033	1.32863	1.61646	1.98071	2.0809	2.25534	2.41933	1.70903	1.08383	1.16263	0.821292
hsa-miR-150*	MIMAT0004610	3.90464	3.53946	4.83789	4.01056	4.87057	4.33944	4.97068	5.05985	5.21369	4.79582	5.14275	5.21203	4.68581	4.27573	4.52269	4.98463	14.9766	11.6274	28.5989	16.1175	29.2542	20.2442	31.3562	33.3555	37.1089	27.7771	35.3283	37.0662	25.7377	19.3696	22.9862	31.6609	17.8301	28.5525	34.3201	24.9386	1.60136	1.92484	1.39868
hsa-miR-151-3p	MIMAT0000757	0.876377	1.5237	-0.568764	1.25672	0.610367	1.83772	-0.0524349	0.287155	0.657808	1.5509	0.69428	-1.79692	1.24559	1.35069	1.27263	1.03377	1.83576	2.87528	0.674194	2.38952	1.52665	3.57446	0.964307	1.22023	1.57768	2.93	1.61808	0.287788	2.37115	2.55034	2.41602	2.04737	1.94369	1.82141	1.60339	2.34622	0.937089	0.82492	1.2071
hsa-miR-17	MIMAT0000070	1.77595	1.62329	0.139354	1.86875	0.378387	2.00714	0.0716376	0.477213	-0.0727267	1.57244	0.529405	-4.78979	0.936058	1.45178	1.21063	0.609891	3.42463	3.08076	1.10141	3.65217	1.29989	4.01985	1.05091	1.39205	0.950839	2.97407	1.44333	0.0361517	1.91329	2.73545	2.31439	1.52614	2.81474	1.94068	1.3511	2.12232	0.689468	0.480008	0.754002
hsa-miR-188-5p	MIMAT0000457	5.17316	5.77155	6.11139	5.95881	6.69822	6.48323	6.5754	6.70183	6.38522	6.65702	6.6662	6.68596	6.54559	6.23287	6.33214	6.75704	36.0808	54.6274	69.1373	62.1984	103.84	89.4634	95.366	104.1	83.5878	100.917	101.561	102.961	93.4158	75.2106	80.568	108.161	55.511	98.1924	97.2566	89.3389	1.76888	1.75202	1.60939
hsa-miR-191*	MIMAT0001618	-1.06177	-1.2883	-0.370358	-0.919075	-0.229827	-0.65831	-0.013329	0.0118389	-0.157233	-0.222455	-0.380408	-0.00475931	-0.506346	-0.871057	-0.881905	-0.130374	0.479044	0.409432	0.77359	0.528848	0.852737	0.63362	0.990804	1.00824	0.896743	0.857106	0.76822	0.996707	0.704003	0.546746	0.542651	0.913594	0.547729	0.87135	0.879694	0.676749	1.59084	1.60608	1.23555
hsa-miR-1914*	MIMAT0007890	1.1162	1.45844	2.45179	1.47503	2.32298	2.05092	2.26101	2.36768	2.11683	2.1543	2.09331	2.45944	2.02943	1.65602	1.78774	2.18535	2.16776	2.74811	5.47095	2.77989	5.00364	4.14371	4.79326	5.16112	4.33739	4.45152	4.26725	5.50002	4.08243	3.15147	3.45274	4.54837	3.29168	4.77543	4.63904	3.80875	1.45076	1.40933	1.15709
hsa-miR-1915	MIMAT0007892	5.1428	4.75089	5.83295	5.02509	5.68974	5.26794	5.67223	5.7084	5.87163	5.60308	5.85393	5.8456	5.48209	5.16011	5.36185	5.7511	35.3294	26.9254	57.0023	32.5614	51.6157	38.5309	50.9933	52.2876	58.5512	48.6067	57.8375	57.5042	44.6965	35.7558	41.1222	53.8586	37.9546	48.3569	55.6249	43.8583	1.27407	1.46556	1.15555
hsa-miR-197	MIMAT0000227	0.39115	-0.0599108	0.102617	0.21944	0.3196	0.409958	0.264585	0.48	0.617863	0.642639	0.759315	0.0814395	0.441886	0.267013	0.530813	0.877696	1.31144	0.959323	1.07372	1.16428	1.24798	1.32865	1.20129	1.39474	1.5346	1.56118	1.69269	1.05807	1.35838	1.20331	1.44474	1.83744	1.12719	1.29317	1.46164	1.46097	1.14725	1.29671	1.29612
hsa-miR-1972	MIMAT0009447	-0.349699	-0.410596	-0.603784	-0.302773	-1.08746	-0.31015	-1.15212	-0.666372	-0.785551	-0.344995	-0.926055	-2.25855	-0.637488	-0.446698	-0.510885	-0.659111	0.784748	0.752312	0.658026	0.810692	0.470589	0.806558	0.449965	0.630089	0.580131	0.787311	0.526296	0.208982	0.642831	0.73372	0.701792	0.633268	0.751445	0.5893	0.52568	0.677903	0.784223	0.699559	0.902133
hsa-miR-198	MIMAT0000228	0.206948	0.279105	1.93157	-0.00775528	1.37873	0.593748	1.25304	1.07469	1.40546	0.840594	0.856313	1.99965	0.899767	0.199595	0.476276	0.935045	1.15424	1.21344	3.81471	0.994639	2.60039	1.50916	2.38343	2.10626	2.64903	1.79079	1.81041	3.99902	1.86576	1.14838	1.39115	1.91195	1.79426	2.14981	2.56231	1.57931	1.19816	1.42806	0.880202
hsa-miR-21 (hsa-miR-21-5p)	MIMAT0000076	0.867886	0.480441	-0.527165	2.09834	-3.91085	-0.327394	-9.24553	-9.55969	-3.82861	-1.59079	-0.395662	-9.90309	-0.607884	0.246704	-1.3342	-2.58807	1.82499	1.39517	0.693917	4.28216	0.066484	0.796975	0.00164747	0.00132509	0.070384	0.33199	0.76014	0.00104441	0.656158	1.18649	0.396611	0.166309	2.04906	0.216608	0.29089	0.601393	0.105711	0.141963	0.293497
hsa-miR-21* (hsa-miR-21-3p)	MIMAT0004494	-0.744967	-0.289797	0.133598	-0.263544	-0.0627308	0.207701	-0.599737	-0.354236	-0.14311	0.043417	-0.700423	-0.753989	-0.326174	-0.896349	-0.584787	-0.47595	0.596682	0.818017	1.09703	0.833039	0.95745	1.15485	0.659874	0.782284	0.905565	1.03055	0.615392	0.592962	0.797649	0.537244	0.666748	0.718993	0.836191	0.888614	0.786118	0.680159	1.06269	0.940117	0.813401
hsa-miR-22 (hsa-miR-22-3p)	MIMAT0000077	1.34829	2.13461	1.49422	2.0771	1.16435	2.21495	0.70212	0.912741	1.66142	1.9056	1.27207	0.627597	1.76547	2.15629	1.85638	1.85808	2.5461	4.39117	2.81712	4.21959	2.24132	4.64266	1.62689	1.88262	3.16327	3.74666	2.41508	1.54499	3.39984	4.45767	3.62098	3.62524	3.4935	2.59837	2.7175	3.77593	0.743774	0.777874	1.08085
hsa-miR-222 (hsa-miR-222-3p)	MIMAT0000279	1.24908	2.10957	0.192234	1.96468	-0.912695	1.40417	-0.92536	-0.761777	0.0615339	1.06802	0.872176	-2.4667	1.33757	2.00158	1.64813	1.18056	2.3769	4.31564	1.14253	3.90326	0.531192	2.64665	0.526549	0.589769	1.04357	2.09656	1.83042	0.180905	2.52725	4.00438	3.13427	2.26665	2.93458	1.07354	1.28786	2.98314	0.365824	0.438858	1.01655
hsa-miR-2276 (hsa-miR-2276-3p)	MIMAT0011775	1.44759	1.29089	2.57466	1.33773	2.2219	1.79859	2.21588	2.24985	2.44	2.2276	2.41994	2.66083	2.08779	1.64995	1.88339	2.40456	2.72751	2.44678	5.9573	2.52754	4.66507	3.4788	4.64565	4.75634	5.42642	4.68356	5.35148	6.32396	4.25096	3.13822	3.68941	5.29475	3.41478	4.38647	5.44635	4.09333	1.28455	1.59493	1.19871
hsa-miR-23a (hsa-miR-23a-3p)	MIMAT0000078	0.472769	0.999956	-0.427626	1.08747	-0.983933	0.394852	-1.05069	-1.06576	-0.150627	0.413478	-0.0974641	-2.2756	0.245172	0.519037	0.261712	-0.32615	1.38777	1.99994	0.743484	2.12501	0.505599	1.31481	0.482736	0.477721	0.900859	1.33189	0.934674	0.206526	1.18523	1.433	1.1989	0.797662	1.56405	0.695216	0.843488	1.1537	0.444497	0.539297	0.737635
hsa-miR-2861	MIMAT0013802	5.01608	4.93199	5.82404	4.99338	5.63632	5.09001	5.60688	5.58128	5.88411	5.6494	5.89816	5.93578	5.46522	5.06449	5.41036	5.73162	32.3586	30.5265	56.6515	31.8534	49.7394	34.0602	48.7349	47.8777	59.0602	50.1926	59.6381	61.2136	44.1769	33.4629	42.5287	53.1362	37.8475	45.103	57.5261	43.3262	1.1917	1.51995	1.14476
hsa-miR-296-5p	MIMAT0000690	0.209485	-0.0706954	1.14397	0.346275	1.07582	0.605666	1.3175	1.32404	1.26766	0.99526	0.960352	1.2909	0.737165	0.300692	0.357896	1.07168	1.15628	0.952179	2.20988	1.27127	2.10791	1.52168	2.49234	2.50366	2.40771	1.99344	1.94579	2.44681	1.6669	1.23174	1.28156	2.10188	1.3974	2.1564	2.19844	1.57052	1.54315	1.57323	1.12388
hsa-miR-29a (hsa-miR-29a-3p)	MIMAT0000086	3.19344	3.56433	0.76395	3.59847	0.326017	2.68416	0.513121	-0.113748	-0.252027	1.91666	0.900296	-4.24503	1.97128	2.6016	1.94255	0.908794	9.14788	11.8296	1.69813	12.1129	1.25355	6.42707	1.42713	0.924184	0.839716	3.77549	1.86645	0.0527374	3.92116	6.06958	3.84384	1.87748	8.69713	2.50799	1.6336	3.92801	0.288369	0.187832	0.451645
hsa-miR-30d (hsa-miR-30d-5p)	MIMAT0000245	2.09827	2.38143	1.9711	2.33433	2.83884	3.23883	2.60701	2.71743	2.65885	3.10201	2.69567	1.38786	2.99734	2.45394	2.85284	2.95218	4.28195	5.21053	3.92067	5.04315	7.15442	9.44027	6.09241	6.57699	6.31531	8.58613	6.47853	2.61691	7.98527	5.47911	7.22421	7.73919	4.61408	7.31602	5.99922	7.10695	1.58559	1.3002	1.54027
hsa-miR-3125	MIMAT0014988	-1.05714	-0.455359	-0.106874	-0.652679	0.13281	-0.103267	0.051878	0.2962	-0.0155225	0.377344	0.108558	0.0409136	0.0770121	-0.0349503	0.0611458	0.291641	0.480582	0.729328	0.928598	0.636098	1.09643	0.930923	1.03661	1.22791	0.989298	1.29895	1.07815	1.02877	1.05483	0.976065	1.04329	1.22403	0.693652	1.07297	1.09879	1.07456	1.54684	1.58407	1.54913
hsa-miR-3131	MIMAT0014996	-1.69513	-1.45232	1.01162	-1.47899	0.361513	-0.228745	0.356283	0.278627	-0.101223	-0.159997	-0.22138	1.03468	-0.220136	-0.969595	-0.75217	-0.239662	0.308827	0.365434	2.01618	0.358739	1.28477	0.853377	1.28012	1.21304	0.932243	0.895027	0.857744	2.04866	0.858484	0.51065	0.59371	0.846944	0.762294	1.15783	1.18342	0.702447	1.51887	1.55244	0.921491
hsa-miR-3137	MIMAT0015005	-0.118285	0.0885592	1.0596	0.0539384	0.929875	0.597451	0.796665	0.900828	1.02081	0.979495	0.954277	1.16781	0.822501	0.44897	0.606275	0.921397	0.921282	1.06331	2.08436	1.03809	1.90511	1.51304	1.73708	1.86714	2.02905	1.97178	1.93761	2.2467	1.76847	1.36507	1.52232	1.89395	1.27676	1.75559	2.04628	1.63745	1.37504	1.60272	1.28251
hsa-miR-3138	MIMAT0015006	-0.173294	-0.156267	1.20114	-0.16703	1.05908	0.665959	0.893111	0.993958	0.888749	0.736537	0.629422	1.28415	0.703768	0.148007	0.318484	0.728727	0.886816	0.897344	2.29921	0.890674	2.08361	1.58662	1.85718	1.99164	1.85157	1.66617	1.54695	2.43538	1.62875	1.10804	1.24702	1.65718	1.24351	1.87976	1.87502	1.41025	1.51166	1.50784	1.13409
hsa-miR-3141	MIMAT0015010	2.37649	2.61768	3.39903	2.70377	3.65735	3.34426	3.53904	3.58286	3.3797	3.48278	3.52789	3.87432	3.42382	3.03566	3.20956	3.6848	5.19273	6.13764	10.549	6.51504	12.6175	10.156	11.6241	11.9825	10.4086	11.1794	11.5346	14.6651	10.7318	8.2002	9.25065	12.8598	7.0986	11.595	11.9469	10.2606	1.63342	1.683	1.44544
hsa-miR-3148	MIMAT0015021	-0.775688	-0.717578	-0.589127	-0.763181	-0.37116	-1.0995	-0.453575	-0.825808	-1.71486	-0.750824	-0.601296	-0.422064	-0.747852	-1.24513	-1.04486	-0.476456	0.58411	0.608118	0.664745	0.589196	0.773161	0.466678	0.730231	0.564166	0.304632	0.594264	0.659161	0.746356	0.595489	0.421871	0.484691	0.718741	0.611542	0.633559	0.576103	0.555198	1.036	0.94205	0.907866
hsa-miR-3149	MIMAT0015022	0.0496612	0.0469832	0.161551	-0.00355196	0.420905	-0.386673	0.402613	0.0319638	-0.752356	0.0505652	0.127588	0.180097	0.14173	-0.363492	-0.286349	0.249032	1.03502	1.0331	1.11849	0.997541	1.33877	0.764891	1.3219	1.0224	0.593633	1.03567	1.09247	1.13296	1.10323	0.777281	0.819974	1.18841	1.04604	1.11199	0.963682	0.972223	1.06305	0.921268	0.929433
hsa-miR-3156-5p	MIMAT0015030	0.700045	1.83323	1.63129	1.49902	1.22206	1.8353	1.04049	1.16793	1.39592	1.6929	1.172	0.750551	1.68051	1.61127	1.60943	1.87115	1.62456	3.56335	3.09791	2.82651	2.3328	3.56846	2.05693	2.24688	2.63157	3.23306	2.25325	1.68244	3.20542	3.0552	3.05131	3.65825	2.77808	2.55127	2.45008	3.24254	0.918356	0.881931	1.16719
hsa-miR-3162-5p	MIMAT0015036	4.76954	4.57866	6.05553	4.73285	5.86636	5.36606	5.80621	5.85925	5.82429	5.68016	5.84802	6.02936	5.52555	5.01891	5.24754	5.7916	27.2757	23.8954	66.5116	26.5907	58.3379	41.2424	55.9557	58.051	56.6611	51.274	57.6007	65.3158	46.0633	32.4222	37.9899	55.3916	36.0684	53.3967	57.7129	42.9668	1.48043	1.6001	1.19126
hsa-miR-3180-3p	MIMAT0015058	0.637174	0.457567	1.60758	0.683939	1.74103	1.26749	1.79802	1.7546	1.72192	1.44454	1.56859	1.82163	1.40596	0.750707	1.07825	1.63191	1.55528	1.37322	3.0474	1.60652	3.34273	2.40742	3.47744	3.37432	3.29875	2.72177	2.96614	3.53479	2.64995	1.68262	2.11147	3.09924	1.89561	3.15048	3.13036	2.38582	1.66199	1.65138	1.2586
hsa-miR-3188	MIMAT0015070	1.42558	1.3884	2.30044	1.48568	2.32889	2.08124	2.20333	2.31378	2.26895	2.15137	2.3212	2.40417	2.05932	1.66593	1.82788	2.30848	2.68623	2.61788	4.92609	2.80049	5.0242	4.23171	4.60541	4.97185	4.81973	4.44251	4.99748	5.2933	4.16789	3.17318	3.55016	4.95362	3.25767	4.70829	4.88825	3.96121	1.44529	1.50054	1.21596
hsa-miR-3194-5p	MIMAT0015078	0.544813	0.518902	1.72726	0.560622	1.43139	0.975282	1.42356	1.45067	1.61846	1.3794	1.51395	1.83672	1.3628	0.890322	1.12606	1.55854	1.45883	1.43286	3.31099	1.47491	2.69707	1.96603	2.68247	2.73335	3.07048	2.6016	2.85592	3.57197	2.57185	1.85359	2.18262	2.94555	1.9194	2.51973	3.02499	2.3884	1.31277	1.57601	1.24435
hsa-miR-3195	MIMAT0015079	3.31516	3.21347	4.60905	3.27356	4.34866	3.69553	4.49532	4.41833	4.70474	4.36904	4.7332	5.0581	4.25342	3.95159	4.03387	4.60938	9.95321	9.27579	24.4041	9.6703	20.374	12.9558	22.5542	21.3821	26.0776	20.664	26.5972	33.3151	19.0725	15.472	16.38	24.4096	13.3258	19.3165	26.6635	18.8335	1.44955	2.00088	1.41331
hsa-miR-3196	MIMAT0015080	3.97045	4.01633	5.11576	4.02055	5.07151	4.69949	4.77827	4.98776	4.83216	4.85688	4.78335	5.26884	4.76852	4.37155	4.49774	4.92382	15.6756	16.1821	34.6736	16.2295	33.6262	25.9829	27.4411	31.7296	28.4855	28.9779	27.5379	38.5549	27.2564	20.6999	22.592	30.3542	20.6902	29.695	30.8891	25.2256	1.43522	1.49293	1.21921
hsa-miR-3198	MIMAT0015083	0.599124	1.07324	1.5709	0.980935	1.69235	1.39119	1.7091	1.85215	1.56894	1.94523	1.82937	1.62314	1.60044	1.51894	1.63873	1.88738	1.5148	2.10416	2.97089	1.97374	3.23182	2.62294	3.26956	3.61039	2.96687	3.85099	3.55381	3.08044	3.03236	2.8658	3.11391	3.69963	2.1409	3.18368	3.36303	3.17792	1.48708	1.57085	1.48439
hsa-miR-32* (hsa-miR-32-3p)	MIMAT0004505	-0.00359058	0.0471182	0.0702267	0.0800962	0.47343	-0.267969	0.517871	0.177429	-0.724578	0.101319	0.217836	0.240686	0.162662	-0.250251	-0.159007	0.388374	0.997514	1.0332	1.04988	1.05709	1.38841	0.830488	1.43184	1.13087	0.605174	1.07275	1.16299	1.18155	1.11935	0.84075	0.895641	1.30892	1.03442	1.1954	1.00562	1.04116	1.15562	0.972155	1.00652
hsa-miR-3202	MIMAT0015089	-0.156126	-0.00246286	1.02595	0.0319772	1.35472	0.783408	1.35984	1.30869	1.03515	0.926211	1.00956	1.85431	1.01375	0.320106	0.623045	1.14936	0.897432	0.998294	2.0363	1.02241	2.55748	1.72119	2.56656	2.47716	2.04933	1.90028	2.0133	3.61578	2.01916	1.24842	1.54012	2.21815	1.23861	2.3306	2.39467	1.75646	1.88163	1.93335	1.41809
hsa-miR-320a (hsa-miR-320a-3p or hsa-miR-320a-5p)	MIMAT0000510 or MIMAT0037311	2.06758	2.41256	2.91363	2.31638	2.92224	2.73398	2.72093	2.83733	2.79546	2.89363	2.70753	2.83964	2.68114	2.24462	2.48696	2.82209	4.19183	5.32417	7.53513	4.98082	7.5802	6.65289	6.59296	7.14697	6.94251	7.43139	6.53205	7.1584	6.41362	4.73913	5.60596	7.07186	5.50799	6.99325	7.01609	5.95764	1.26966	1.2738	1.08164
hsa-miR-320b	MIMAT0005792	2.13786	2.9982	2.93456	2.74831	3.04834	3.28306	2.73626	2.91042	2.68369	3.13813	2.71606	2.30602	2.87932	2.45992	2.67312	3.03348	4.40108	7.99	7.64523	6.7193	8.27262	9.7342	6.66338	7.51839	6.42499	8.80381	6.57077	4.94515	7.35801	5.50186	6.37808	8.18785	6.6889	8.04715	6.68618	6.85645	1.20306	0.999594	1.02505
hsa-miR-320c	MIMAT0005793	5.2832	5.41545	6.98671	5.18377	6.49329	5.94084	6.3031	6.37816	6.59763	6.1863	6.21319	7.07678	6.09649	5.45212	5.68312	6.15047	38.9404	42.6789	126.826	36.347	90.0899	61.4289	78.9626	83.1796	96.8469	72.8221	74.1919	134.997	68.427	43.7777	51.3793	71.0356	61.1982	78.4153	94.7145	58.6549	1.28133	1.54767	0.958442
hsa-miR-320d	MIMAT0006764	2.18119	3.13909	1.9331	2.80162	1.98261	2.88488	1.78643	1.9052	1.47836	2.29307	1.81045	0.605751	2.33784	2.53616	2.33211	2.50781	4.53529	8.80966	3.81874	6.97222	3.95208	7.38647	3.44959	3.7456	2.78631	4.90098	3.50752	1.52177	5.05546	5.80041	5.03543	5.68756	6.03398	4.63343	3.17915	5.39471	0.76789	0.526874	0.894055
hsa-miR-320e	MIMAT0015072	1.80688	2.64977	1.57031	2.32793	1.4635	2.37789	1.32163	1.39803	1.0658	1.81582	1.39494	0.21048	1.86737	2.07657	1.91372	2.06139	3.49884	6.27567	2.96969	5.02083	2.75777	5.19775	2.49948	2.63541	2.09333	3.52059	2.62978	1.15707	3.64866	4.21804	3.76781	4.1739	4.44126	3.2726	2.35019	3.9521	0.736864	0.529173	0.889861
hsa-miR-3605-5p	MIMAT0017981	-1.82878	-1.14683	-0.666617	-1.31104	-0.143565	-0.398463	-0.198397	-0.00725698	-0.582434	-0.285163	-0.559378	-0.31954	-0.292135	-0.727947	-0.440061	-0.15937	0.281503	0.451618	0.629982	0.40303	0.90528	0.758666	0.871519	0.994982	0.667836	0.820649	0.678595	0.801325	0.816693	0.603763	0.737104	0.895416	0.441533	0.882612	0.742101	0.763244	1.99897	1.68074	1.72862
hsa-miR-3610	MIMAT0017987	1.64549	1.77899	2.58045	1.84757	2.72274	2.40141	2.68073	2.71842	2.7922	2.70881	2.83362	2.91807	2.72649	2.333	2.4989	2.94324	3.12854	3.43186	5.98126	3.59893	6.60125	5.2832	6.41179	6.58149	6.92686	6.53781	7.1286	7.55833	6.61846	5.03853	5.65256	7.69139	4.03514	6.21943	7.0379	6.25023	1.54132	1.74415	1.54895
hsa-miR-3646	MIMAT0018065	-0.0814004	-0.889595	0.429152	-0.587083	-0.295511	-0.554804	-0.0718641	-0.164245	0.485623	-0.0938358	0.316675	-0.0609345	-0.144286	-0.563623	-0.366539	-0.0261788	0.94514	0.539766	1.34644	0.665687	0.814784	0.68075	0.951408	0.892395	1.40019	0.937028	1.24546	0.958643	0.904827	0.676601	0.775641	0.982018	0.874259	0.834834	1.13533	0.834772	0.954905	1.29862	0.954834
hsa-miR-3648	MIMAT0018068	2.7029	2.72668	3.41461	2.92135	3.43129	3.2182	3.39772	3.51269	3.38141	3.37213	3.40773	3.56032	3.2717	3.05424	3.20591	3.53174	6.5111	6.61933	10.6635	7.57553	10.7875	9.30624	10.5394	11.4136	10.4209	10.3541	10.6128	11.7968	9.65784	8.30647	9.22729	11.5654	7.84236	10.5117	10.7961	9.68924	1.34037	1.37664	1.2355
hsa-miR-3652	MIMAT0018072	1.09912	1.24208	2.35698	1.08852	2.1503	1.74191	1.94047	1.91017	1.98407	1.9883	1.85719	2.36116	1.89651	1.38911	1.56842	1.92765	2.14224	2.36539	5.12298	2.12656	4.43921	3.34478	3.8383	3.75853	3.95608	3.9677	3.62301	5.13783	3.72312	2.61916	2.96581	3.80435	2.93929	3.84521	4.17115	3.27811	1.30821	1.4191	1.11527
hsa-miR-3656	MIMAT0018076	3.81964	3.6066	4.7322	3.76374	4.87235	4.37134	4.85995	4.84802	4.53381	4.34378	4.68178	4.83797	4.6054	4.22144	4.48196	5.04169	14.1197	12.1814	26.5788	13.5831	29.2902	20.6969	29.0397	28.8004	23.1639	20.3052	25.6659	28.6006	24.3424	18.6544	22.3462	32.9383	16.6157	26.9568	24.4339	24.5703	1.62236	1.47053	1.47874
hsa-miR-3663-3p	MIMAT0018085	5.03161	4.87207	5.63018	5.04879	5.74271	5.36543	5.61142	5.62315	5.59425	5.62866	5.81272	5.59896	5.5883	5.28563	5.46875	5.85732	32.7089	29.2846	49.5283	33.1006	53.546	41.2246	48.8883	49.2873	48.3099	49.476	56.2086	48.4681	48.1111	39.0062	44.285	57.9734	36.1556	48.2366	50.6156	47.3439	1.33414	1.39994	1.30945
hsa-miR-3665	MIMAT0018087	5.07493	4.90857	5.89734	5.08978	5.87371	5.25823	5.9134	5.83045	5.88026	5.69818	6.05191	6.22874	5.69459	5.30026	5.68911	6.13303	33.7058	30.035	59.6043	34.0547	58.6358	38.2723	60.2715	56.9037	58.9024	51.9185	66.3447	74.9958	51.7895	39.4038	51.5931	70.1821	39.35	53.5208	63.0404	53.2421	1.36012	1.60204	1.35304
hsa-miR-3667-5p	MIMAT0018089	0.374008	0.0500755	1.83064	-0.0368056	0.937925	0.281941	1.00294	0.85222	1.77767	0.932271	1.1226	1.49743	0.801172	0.0563421	0.396579	0.726295	1.29595	1.03532	3.55694	0.974811	1.91577	1.21583	2.00408	1.80528	3.42873	1.90828	2.17739	2.82339	1.74252	1.03983	1.31638	1.65439	1.71575	1.73524	2.58445	1.43828	1.01136	1.5063	0.838277
hsa-miR-3676	MIMAT0018100	-0.88636	-1.19473	-0.115686	-0.746491	-0.0403242	-0.481242	0.19717	0.19737	0.0687175	-0.054924	-0.193523	0.168485	-0.361399	-0.769403	-0.717096	0.0199895	0.540977	0.436868	0.922943	0.596051	0.972436	0.716361	1.14645	1.14661	1.04878	0.962645	0.874468	1.12388	0.778409	0.58666	0.608321	1.01395	0.62421	0.995463	1.00244	0.746835	1.59476	1.60594	1.19645
hsa-miR-3679-5p	MIMAT0018104	2.75573	2.89756	3.73652	2.83651	3.87238	3.29037	3.89553	3.8611	3.71376	3.61951	3.7028	4.21387	3.66808	3.20477	3.54158	3.83214	6.75395	7.45165	13.3292	7.14291	14.6455	9.78361	14.8823	14.5314	13.1206	12.2908	13.0213	18.5567	12.7117	9.21999	11.6445	14.2426	8.66944	13.4607	14.2474	11.9547	1.55266	1.6434	1.37895
hsa-miR-370 (hsa-miR-370-3p or hsa-miR-370-5p)	MIMAT0000722 or MIMAT0026483	-1.17307	-0.752722	0.121141	-0.906547	0.179535	-0.0795054	0.0727906	0.306135	0.101359	0.131002	-0.142232	0.0298085	-0.024137	-0.482918	-0.17636	-0.00104189	0.443477	0.593483	1.08759	0.533461	1.13252	0.946382	1.05175	1.23639	1.07278	1.09505	0.906116	1.02088	0.983409	0.715529	0.884933	0.999278	0.664504	1.09176	1.02371	0.895787	1.64297	1.54056	1.34805
hsa-miR-371-5p	MIMAT0004687	2.12136	2.51077	3.50042	2.04744	3.78876	3.27754	3.69983	3.62271	3.47307	3.20838	3.24435	3.40835	3.52666	2.86415	3.28146	3.52538	4.35105	5.69926	11.317	4.13373	13.8207	9.69704	12.9945	12.3182	11.1045	9.24309	9.47649	10.6173	11.5248	7.28106	9.72343	11.5145	6.37525	12.2076	10.1104	10.0109	1.91484	1.58588	1.57028
hsa-miR-373*	MIMAT0000725	-1.38075	-1.37469	-0.708087	-1.01255	-0.0683236	-0.463021	-0.0787759	-0.0719743	-0.418957	-0.278102	-0.222229	0.103854	-0.39622	-0.804641	-0.543933	0.149429	0.384018	0.385636	0.612131	0.495668	0.953746	0.725465	0.946861	0.951335	0.747965	0.824675	0.85724	1.07464	0.759846	0.572505	0.685898	1.10913	0.469363	0.894352	0.87613	0.781845	1.90546	1.86664	1.66576
hsa-miR-378	MIMAT0000732 or many	-0.198106	-0.115429	-0.00780058	0.100939	0.419639	0.529058	0.219709	0.266413	0.314488	0.500614	0.157295	-0.711067	0.512784	-0.00104189	0.271348	0.199273	0.871694	0.923108	0.994608	1.07247	1.33759	1.44299	1.1645	1.20281	1.24357	1.41482	1.11519	0.610868	1.4268	0.999278	1.20693	1.14812	0.96547	1.28697	1.09611	1.19528	1.333	1.13531	1.23803
hsa-miR-3911	MIMAT0018185	0.0323243	-0.0585451	0.849789	-0.0516133	0.702121	0.481016	0.501743	0.622905	0.798617	0.622003	0.680563	0.990119	0.588669	0.241947	0.40311	0.790926	1.02266	0.960232	1.80224	0.964857	1.62689	1.39573	1.41592	1.53997	1.73943	1.53901	1.60277	1.98635	1.50386	1.18259	1.32236	1.73019	1.1875	1.49463	1.71689	1.43475	1.25864	1.44581	1.20821
hsa-miR-3917	MIMAT0018191	-0.253449	-0.304258	0.29053	-0.182105	0.344556	0.152046	0.2611	0.317968	0.291704	0.324959	0.429847	0.368973	0.261832	0.009377	0.121677	0.466288	0.838889	0.809858	1.22309	0.881416	1.26976	1.11114	1.19839	1.24657	1.22409	1.25263	1.34709	1.29143	1.199	1.00652	1.088	1.38155	0.938313	1.20647	1.27881	1.16877	1.28578	1.36288	1.24561
hsa-miR-3937	MIMAT0018352	1.24428	0.892571	1.80045	1.20373	1.85263	1.50546	1.88328	1.84342	2.10886	1.83357	2.03584	1.95911	1.68904	1.29471	1.4519	1.95249	2.36899	1.85648	3.48329	2.30334	3.61159	2.83916	3.68912	3.58859	4.31352	3.56417	4.10061	3.88822	3.22442	2.45328	2.73567	3.87042	2.50303	3.43211	3.96663	3.07095	1.37119	1.58473	1.22689
hsa-miR-3945	MIMAT0018361	0.272583	0.0221715	1.25463	0.273481	1.11443	0.553599	1.20662	1.20512	1.51656	1.09686	1.14476	1.42963	0.938856	0.422502	0.601549	0.970836	1.20797	1.01549	2.38606	1.20872	2.16509	1.46774	2.30797	2.30557	2.86109	2.13888	2.2111	2.69377	1.91701	1.34025	1.51735	1.95998	1.45456	2.06159	2.47621	1.68364	1.41733	1.70238	1.1575
hsa-miR-422a	MIMAT0001339	-1.58212	-1.25835	-0.685639	-1.16166	-0.436079	-0.813414	-0.239655	-0.30828	-0.528019	-0.421946	-0.106912	-0.0892348	-0.443235	-0.794953	-0.512773	-0.00478077	0.333992	0.418021	0.62173	0.446999	0.739141	0.569034	0.846948	0.807604	0.693506	0.746417	0.928574	0.940021	0.735484	0.576362	0.700874	0.996692	0.455185	0.740682	0.82713	0.752353	1.62721	1.81713	1.65285
hsa-miR-423-5p	MIMAT0004748	0.977828	1.27543	1.50426	1.1605	1.77238	1.70739	1.63503	1.63836	2.07894	2.09326	1.95971	1.8085	1.9907	1.38571	1.75423	1.99362	1.9695	2.42071	2.83679	2.23535	3.41616	3.26569	3.10593	3.11312	4.22497	4.2671	3.88985	3.50277	3.97429	2.613	3.37346	3.98235	2.36559	3.22523	3.97117	3.48578	1.36339	1.67873	1.47354
hsa-miR-4257	MIMAT0016878	-1.22526	-1.28629	-0.200765	-1.23969	-0.111788	-0.575151	-0.229169	-0.10881	-0.0259495	-0.311164	-0.284777	0.0299177	-0.409222	-0.952714	-0.742124	-0.360369	0.427721	0.410003	0.870089	0.423465	0.925441	0.671216	0.853126	0.927353	0.982174	0.805991	0.820868	1.02095	0.753029	0.51666	0.597858	0.778965	0.53282	0.844284	0.907497	0.661628	1.58456	1.7032	1.24175
hsa-miR-4270	MIMAT0016900	4.54158	4.6981	6.00098	4.67752	5.83253	5.33196	5.72778	5.72923	5.57789	5.53559	5.53535	6.16029	5.48255	4.95205	5.19918	5.67969	23.2891	25.9578	64.0437	25.5902	56.9858	40.2792	52.9949	53.0481	47.7654	46.385	46.3775	71.5205	44.7108	30.954	36.7375	51.2575	34.7202	50.827	53.0121	40.9149	1.4639	1.52684	1.17842
hsa-miR-4271	MIMAT0016901	1.35782	1.43051	2.24806	1.55457	2.54158	2.18317	2.48154	2.57058	2.31033	2.30915	2.39276	2.68804	2.26781	1.80186	1.95437	2.46958	2.56297	2.69542	4.75043	2.93746	5.82227	4.54152	5.58492	5.9405	4.95996	4.9559	5.25161	6.44439	4.81592	3.48669	3.87548	5.53884	3.23657	5.4723	5.40296	4.42923	1.69077	1.66935	1.3685
hsa-miR-4274	MIMAT0016906	-0.645708	-0.951674	0.293841	-0.662478	0.0176249	-0.452636	0.204639	0.235936	0.389992	0.0348516	-0.00136375	0.307702	-0.234256	-0.765356	-0.745276	0.00938082	0.639179	0.517032	1.2259	0.631792	1.01229	0.730707	1.1524	1.17767	1.31039	1.02445	0.999055	1.23773	0.850123	0.588308	0.596554	1.00652	0.753476	1.01827	1.14291	0.760377	1.35143	1.51685	1.00916
hsa-miR-4281	MIMAT0016907	8.35036	8.14473	9.54696	8.53467	9.57433	8.76312	9.77015	9.65775	9.49055	9.1735	9.8166	9.84086	9.1609	8.55182	8.95887	9.63362	326.37	283.014	748.031	370.845	762.359	434.471	873.191	807.742	719.351	577.429	901.76	917.053	572.41	375.28	497.609	794.343	432.065	719.441	778.898	559.911	1.66512	1.80273	1.29589
hsa-miR-4286	MIMAT0016916	2.28272	1.49522	0.435252	1.84208	0.0830088	0.795129	0.0212884	-0.155259	-0.405773	0.54826	0.19083	-2.59914	0.779468	0.93785	1.04449	0.847077	4.86594	2.81907	1.35215	3.58526	1.05922	1.73523	1.01487	0.897971	0.754832	1.46232	1.14142	0.165037	1.7165	1.91567	2.06264	1.79885	3.1556	1.17682	0.880902	1.87342	0.372931	0.279155	0.593679
hsa-miR-4294	MIMAT0016849	-0.204053	-0.361867	-0.19636	-0.123046	0.308547	0.30048	0.162136	0.295923	0.0867291	0.238966	0.169512	0.0807824	0.27072	0.0962477	0.121935	0.376122	0.868108	0.778157	0.87275	0.918247	1.23846	1.23155	1.11894	1.22767	1.06196	1.18015	1.12468	1.05759	1.20641	1.06899	1.08819	1.29785	0.859315	1.20416	1.10609	1.16536	1.4013	1.28718	1.35615
hsa-miR-4298	MIMAT0016852	1.91365	1.78501	2.78863	1.95873	2.83791	2.48285	2.82974	2.76424	2.58097	2.50191	2.67756	3.16535	2.56739	2.16785	2.4167	2.9413	3.76762	3.44621	6.90974	3.88721	7.14982	5.59	7.10944	6.79388	5.98342	5.66433	6.39773	8.9715	5.92736	4.49353	5.3395	7.68101	4.5027	6.66078	6.75425	5.86035	1.47929	1.50004	1.30152
hsa-miR-4306	MIMAT0016858	-0.152953	-0.230371	0.5084	-0.0214066	0.794151	0.598669	0.784631	0.794265	0.559791	0.54585	0.448604	1.30577	0.546829	0.0935149	0.243562	0.587297	0.899408	0.852416	1.42247	0.985272	1.73406	1.51432	1.72265	1.73419	1.47406	1.45988	1.36472	2.47216	1.46087	1.06697	1.18391	1.50243	1.03989	1.67631	1.6927	1.30354	1.612	1.62777	1.25354
hsa-miR-4322	MIMAT0016873	0.413102	0.231046	1.06017	0.437839	1.2249	0.934973	1.22699	1.34611	1.23653	1.08833	1.2915	1.31437	1.02705	0.712033	0.817414	1.38056	1.33155	1.17369	2.08518	1.35457	2.3374	1.91186	2.34078	2.54226	2.35632	2.12628	2.44782	2.48693	2.03785	1.63811	1.76224	2.6037	1.48625	2.28307	2.35434	2.01048	1.53613	1.58408	1.35272
hsa-miR-4327	MIMAT0016889	3.53442	3.24507	4.51784	3.56731	4.38788	3.88444	4.52103	4.57442	4.79161	4.37512	4.69188	4.72853	4.25167	3.80594	4.10092	4.56277	11.5869	9.48121	22.9089	11.854	20.9354	14.7684	22.9597	23.8253	27.696	20.7512	25.8461	26.5112	19.0494	13.9863	17.1594	23.6336	13.9578	20.6222	25.2011	18.4572	1.47747	1.80553	1.32236
hsa-miR-483-5p	MIMAT0004761	2.76117	3.14696	4.01504	2.92706	4.35664	3.89038	4.35957	4.3912	4.10906	4.09297	3.98403	4.85847	4.03767	3.38868	3.7075	4.25194	6.77948	8.85786	16.1676	7.60556	20.487	14.8293	20.5287	20.9838	17.2564	17.065	15.8239	29.0099	16.4233	10.4736	13.0638	19.0529	9.85263	19.2072	19.7888	14.7534	1.94945	2.00848	1.49741
hsa-miR-494	MIMAT0002816	5.93671	5.02849	4.6741	5.73514	3.63513	5.05594	4.11863	3.88394	4.49684	4.54162	4.26141	3.24867	4.85391	5.03886	5.32659	4.02124	61.2531	32.6382	25.5296	53.2659	12.4246	33.2652	17.3713	14.7632	22.5779	23.2897	19.1784	9.50492	28.9183	32.8737	40.1294	16.2373	43.1717	19.4561	18.6377	29.5397	0.450667	0.431711	0.684237
hsa-miR-514b-5p	MIMAT0015087	-1.29774	-1.08057	-0.0476289	-1.12864	0.332809	-0.32317	0.344832	0.249009	0.0641503	-0.0928168	-0.0555248	1.0476	0.0175824	-0.674147	-0.341102	0.200645	0.406763	0.472841	0.967525	0.457348	1.25946	0.799312	1.27	1.18839	1.04547	0.93769	0.962244	2.06709	1.01226	0.626703	0.789438	1.14921	0.576119	1.12929	1.25312	0.894404	1.96017	2.17511	1.55246
hsa-miR-516a-5p	MIMAT0004770	-1.80153	-1.51896	-0.40833	-1.58143	0.0368376	-0.370041	-0.0552444	0.193522	-0.592819	-0.318037	-0.684214	0.308817	-0.238149	-0.903549	-0.426698	-0.319131	0.286869	0.348936	0.753495	0.33415	1.02586	0.77376	0.962431	1.14355	0.663046	0.802161	0.622345	1.23869	0.847833	0.53457	0.743963	0.801552	0.430863	0.976402	0.831561	0.731979	2.26615	1.92999	1.69887
hsa-miR-520b	MIMAT0002843	2.17115	2.56944	2.98372	2.65618	3.43578	3.22706	3.21104	3.35681	3.23178	3.41872	3.32045	3.42903	3.29793	2.94143	3.00194	3.39683	4.50382	5.93578	7.91024	6.30362	10.8212	9.36356	9.26018	10.2447	9.39425	10.6939	9.98977	10.7706	9.83505	7.68174	8.01077	10.5329	6.16337	9.9224	10.2121	9.01511	1.6099	1.65691	1.46269
hsa-miR-520e	MIMAT0002825	1.4118	1.66265	2.05721	1.77622	2.49712	2.26132	2.29887	2.41235	2.28057	2.43095	2.4159	2.40414	2.34403	1.99642	2.05664	2.41958	2.6607	3.16597	4.1618	3.42527	5.64559	4.7943	4.92071	5.32341	4.8587	5.39248	5.33654	5.2932	5.07719	3.99008	4.16017	5.35015	3.35343	5.171	5.22023	4.64439	1.542	1.55668	1.38497
hsa-miR-557	MIMAT0003221	1.65461	1.72724	2.72088	1.96707	2.86046	2.26896	3.04643	2.98384	2.8991	2.77321	3.02577	3.31884	2.67963	2.22812	2.40178	3.03718	3.14837	3.31094	6.59277	3.90973	7.26247	4.81974	8.26165	7.91086	7.45962	6.83628	8.14416	9.9786	6.40693	4.68523	5.28455	8.20887	4.24045	7.06368	8.10466	6.1464	1.66578	1.91127	1.44947
hsa-miR-564	MIMAT0003228	0.1628	0.500933	1.27273	0.284765	0.7588	0.691411	0.478086	0.673748	0.752867	0.849865	0.696137	0.674496	0.498509	0.348899	0.308221	0.724567	1.11946	1.41513	2.41618	1.21821	1.69208	1.61486	1.39289	1.59521	1.68514	1.80233	1.62016	1.59604	1.41275	1.27359	1.23818	1.6524	1.54224	1.57376	1.67592	1.39423	1.02044	1.08667	0.904028
hsa-miR-572	MIMAT0003237	2.17818	2.84216	3.29399	2.97308	3.68131	2.97905	3.69169	3.68831	3.34396	3.80062	3.69848	4.17383	3.52848	3.28296	3.71282	3.93175	4.52583	7.17093	9.80822	7.85209	12.8287	7.88468	12.9214	12.8911	10.1539	13.9348	12.9824	18.0488	11.5393	9.73354	13.1121	15.2607	7.33927	11.6315	13.78	12.4114	1.58483	1.87757	1.69109
hsa-miR-574-5p	MIMAT0004795	1.99467	1.79596	2.05092	1.92874	2.19284	1.56171	2.3142	2.01224	1.30798	1.84367	1.99009	1.85436	1.89191	1.61732	1.61668	2.13311	3.98525	3.47246	4.14369	3.80723	4.57205	2.95203	4.97328	4.03408	2.47594	3.58921	3.97261	3.61591	3.71126	3.06804	3.06669	4.38663	3.85216	4.13286	3.41342	3.55815	1.07287	0.886106	0.923679
hsa-miR-575	MIMAT0003240	2.71765	2.72142	3.89959	2.57331	3.77183	3.3774	3.68647	3.79297	4.12838	3.83453	3.8202	3.78257	3.57324	2.9696	3.29167	3.3278	6.57799	6.59521	14.9243	5.95173	13.6594	10.392	12.8747	13.8611	17.489	14.2662	14.1252	13.7615	11.9029	7.83319	9.79244	10.0408	8.51231	12.6968	14.9105	9.89231	1.49158	1.75164	1.16212
hsa-miR-595	MIMAT0003263	-0.604322	-0.475996	-0.441287	-0.474869	-0.114749	-0.759069	-0.149317	-0.507322	-1.39115	-0.449758	-0.418452	-0.0193448	-0.406921	-0.851459	-0.714309	-0.0636816	0.65778	0.71897	0.736477	0.719532	0.923543	0.590877	0.901677	0.703527	0.38126	0.732166	0.748227	0.986681	0.754231	0.554224	0.609497	0.956819	0.70819	0.779906	0.712083	0.718693	1.10127	1.0055	1.01483
hsa-miR-601	MIMAT0003269	1.14676	1.66533	2.22194	1.68651	2.68959	2.40831	2.48682	2.60655	2.50509	2.66953	2.58017	2.86486	2.5476	2.12622	2.26192	2.66589	2.21416	3.17185	4.66519	3.21878	6.45132	5.30853	5.60543	6.09044	5.67686	6.36221	5.98008	7.28464	5.84661	4.36572	4.79628	6.34618	3.31749	5.86393	6.32595	5.3387	1.76758	1.90685	1.60926
hsa-miR-622	MIMAT0003291	-1.20179	-1.18077	0.192759	-1.20684	-0.366102	-0.818149	-0.203177	-0.176542	0.054534	-0.237313	-0.290037	-0.0381656	-0.445764	-0.82278	-0.638596	-0.389986	0.434736	0.441115	1.14295	0.433217	0.775876	0.567169	0.868636	0.884821	1.03852	0.848324	0.817881	0.973892	0.734196	0.565351	0.642338	0.763137	0.613004	0.774125	0.919655	0.676256	1.26284	1.50024	1.10318
hsa-miR-623	MIMAT0003292	-1.04758	-0.955511	0.232622	-1.11781	-0.114086	-0.572263	-0.229342	-0.27874	0.0330591	-0.153039	-0.139703	0.122041	-0.23617	-0.774875	-0.41889	-0.154643	0.483779	0.515659	1.17497	0.460792	0.923968	0.672561	0.853024	0.824311	1.02318	0.899354	0.907706	1.08827	0.848996	0.584439	0.748	0.898355	0.658799	0.818466	0.979628	0.769947	1.24236	1.48699	1.16871
hsa-miR-629* (hsa-miR-629-3p)	MIMAT0003298	1.74178	1.27683	1.50274	1.76696	2.01827	1.96867	1.8859	1.86689	1.99069	2.05135	2.27142	1.63744	2.07033	1.93297	1.91365	2.31296	3.34448	2.42305	2.83381	3.40337	4.05098	3.91407	3.69583	3.64746	3.97427	4.14493	4.82798	3.11114	4.19983	3.81841	3.76761	4.96902	3.00118	3.82708	4.01458	4.18872	1.27519	1.33767	1.39569
hsa-miR-630	MIMAT0003299	4.12603	4.16361	5.13399	3.94197	4.6343	3.74537	4.99237	4.70531	5.24174	4.8562	5.4716	5.34903	4.95624	4.43655	4.9764	5.29503	17.4606	17.9213	35.1144	15.3692	24.8349	13.4113	31.8311	26.0879	37.8374	28.9642	44.3728	40.7586	31.044	21.6538	31.4807	39.2612	21.4664	24.0413	37.9833	30.8599	1.11995	1.76943	1.43759
hsa-miR-638	MIMAT0003308	4.90898	5.09737	5.79942	5.12149	5.85313	5.17717	5.83695	5.81912	5.85295	5.87735	5.96849	6.19487	5.62554	5.26583	5.6527	5.94472	30.0435	34.2343	55.6929	34.8115	57.8053	36.1813	57.1606	56.4587	57.7982	58.7838	62.6175	73.2556	49.3692	38.4743	50.3075	61.594	38.6955	51.9015	63.1138	49.9363	1.34128	1.63103	1.29049
hsa-miR-642b	MIMAT0018444	3.72777	3.91753	5.06721	3.94041	5.24052	4.68298	5.23578	5.17371	4.98235	4.86739	4.89704	5.41803	4.84902	4.15937	4.49283	4.84982	13.2486	15.111	33.526	15.3526	37.8053	25.6872	37.6813	36.0946	31.611	29.1898	29.7958	42.7552	28.8205	17.8687	22.5153	28.8364	19.3096	34.3171	33.3379	24.5102	1.77721	1.7265	1.26933
hsa-miR-659 (hsa-miR-659-3p)	MIMAT0003337	-0.490256	-0.0600815	0.53186	-0.173723	0.524716	0.366294	0.452484	0.526467	0.323638	0.377435	0.179002	0.670201	0.416829	0.0830908	0.238286	0.661633	0.711899	0.95921	1.44579	0.886552	1.43865	1.28904	1.36839	1.4404	1.25148	1.29903	1.1321	1.59129	1.33499	1.05928	1.17959	1.58187	1.00086	1.38412	1.31848	1.28893	1.38293	1.31734	1.28782
hsa-miR-663 (hsa-miR-663a)	MIMAT0003326	5.28721	5.27544	5.61316	5.38629	5.81634	5.78851	5.58126	5.79871	5.59393	5.69768	5.54589	5.18233	5.37942	5.20453	5.29302	5.6251	39.049	38.7316	48.9473	41.8248	56.3497	55.2734	47.8769	55.6654	48.2992	51.9007	46.7176	36.3108	41.6262	36.874	39.2064	49.3541	42.1382	53.7914	45.8071	41.7652	1.27655	1.08707	0.991148
hsa-miR-671-5p	MIMAT0003880	2.20085	2.44716	3.65782	2.36158	3.42408	3.08586	3.36613	3.43939	3.36734	3.31423	3.36563	3.73624	3.23397	2.82234	2.92041	3.62398	4.59749	5.45343	12.6216	5.13931	10.7338	8.49058	10.3111	10.8482	10.3198	9.94677	10.3076	13.3266	9.40852	7.07309	7.57063	12.3289	6.95296	10.0959	10.9752	9.09529	1.45203	1.57849	1.30812
hsa-miR-718	MIMAT0012735	4.20868	4.02739	4.58603	4.18137	4.8501	4.57428	4.66144	4.76202	4.66718	4.69229	4.67635	4.51273	4.59251	4.27632	4.36509	4.73842	18.4901	16.3067	24.0177	18.1433	28.8421	23.8229	25.3066	27.1337	25.4075	25.8535	25.5694	22.828	24.1259	19.3776	20.6074	26.6936	19.2395	26.2763	24.9146	22.7011	1.36575	1.29497	1.17992
hsa-miR-762	MIMAT0010313	7.80051	7.58832	8.36533	7.75053	8.58983	8.30356	8.39263	8.47104	8.52411	8.42914	8.68393	8.4664	8.39373	7.96648	8.19917	8.6421	222.94	192.447	329.773	215.349	385.297	315.951	336.074	354.843	368.14	344.687	411.266	353.704	336.33	250.12	293.897	399.514	240.127	348.041	369.449	319.965	1.4494	1.53856	1.33248
hsa-miR-765	MIMAT0003945	0.421337	0.898018	1.53309	0.76432	2.19604	1.90857	2.24986	2.35957	1.80313	1.90777	1.77317	2.73678	1.94176	1.29186	1.66488	2.21559	1.33917	1.8635	2.89406	1.69857	4.58221	3.75437	4.75636	5.13217	3.48977	3.75228	3.41805	6.6658	3.84174	2.44843	3.17088	4.6447	1.94882	4.55628	4.33147	3.52644	2.33796	2.22261	1.80952
hsa-miR-874	MIMAT0004911	-0.440359	-0.563184	0.169837	-0.535156	0.0764589	-0.13865	0.0616536	0.14197	0.423106	0.19873	0.334735	0.388755	0.122134	-0.207891	0.0419269	0.361909	0.736951	0.676807	1.12493	0.690084	1.05443	0.908368	1.04366	1.10341	1.34081	1.14769	1.26115	1.30926	1.08834	0.865802	1.02949	1.28513	0.807193	1.02747	1.26473	1.06719	1.27289	1.56682	1.3221
hsa-miR-877 (hsa-miR-877-5p)	MIMAT0004949	1.29651	1.09006	2.00896	1.25634	1.9673	1.83272	1.85613	2.06424	1.86074	1.75958	1.88325	1.92041	1.72087	1.47528	1.49191	2.0186	2.45633	2.12882	4.02493	2.3889	3.91035	3.56209	3.62035	4.18214	3.63193	3.386	3.68904	3.7853	3.29634	2.78039	2.8126	4.05191	2.74975	3.81873	3.62307	3.23531	1.38876	1.3176	1.17659
hsa-miR-887 (hsa-miR-887-3p or hsa-miR-887-5p)	MIMAT0004951 or MIMAT0026720	0.135494	-0.163555	0.373227	-0.21875	0.283976	-0.000769615	0.257366	0.291558	0.764864	0.322859	0.376365	-0.0027709	0.147655	-0.173952	-0.00405312	0.179359	1.09847	0.892822	1.29525	0.85931	1.21755	0.999467	1.19529	1.22396	1.69921	1.25081	1.29807	0.998081	1.10777	0.886411	0.997195	1.13238	1.03646	1.15907	1.31154	1.03094	1.11829	1.2654	0.994671
hsa-miR-92a	MIMAT0000092	2.51456	3.49672	2.24157	2.961	1.89385	2.79148	1.59119	1.76112	2.37544	3.07735	2.54071	0.614953	2.77624	2.96225	2.92744	2.98734	5.71425	11.288	4.72911	7.78666	3.71625	6.92342	3.01299	3.38961	5.18895	8.44061	5.81876	1.53151	6.85065	7.79338	7.60757	7.9301	7.3795	4.26056	5.24496	7.54542	0.577351	0.710747	1.02248
hsa-miR-939	MIMAT0004982	2.04841	1.97691	2.74799	2.23223	2.87394	2.50816	2.87689	2.94174	2.75011	2.81725	3.07231	2.89487	2.79617	2.58045	2.72403	3.22699	4.13648	3.93649	6.71781	4.69858	7.33062	5.68895	7.34564	7.68336	6.7277	7.04818	8.41117	7.43775	6.94592	5.98126	6.60717	9.3631	4.87234	7.01214	7.4062	7.22436	1.43917	1.52005	1.48273
hsa-miR-940	MIMAT0004983	1.7636	1.06304	1.92307	1.44461	1.7586	1.39321	1.84323	1.82355	2.24896	1.86929	2.15811	1.65381	1.6818	1.48826	1.62114	1.89303	3.39544	2.08933	3.79229	2.72189	3.3837	2.62663	3.58811	3.53952	4.75341	3.65354	4.4633	3.14665	3.20828	2.80551	3.07618	3.71414	2.99974	3.28449	4.00422	3.20103	1.09493	1.33486	1.0671
